# Supplementary material for: Circulating cathelicidin levels correlate with mucosal disease activity in ulcerative colitis, risk of intestinal stricture in Crohn’s disease, and clinical prognosis in inflammatory bowel disease
Source: PubMed Central journal article supplement (PMC5427565; doi:10.1186/s12876-017-0619-4), 2017-05-12
Supplement: 12876_2017_619_MOESM1_ESM.pdf [file 12876_2017_619_MOESM1_ESM.pdf]

Supplementary Figure 1

UC clinical remission: PMS = 0-1

A

| test positive<br>test negative | LL-37 40ng/ml or above<br>any others |                   |      | CRP 0.4mg/L or below<br>any others |                   |      | LL-37 40ng/ml or above + CRP 0.4mg/L or below<br>any others |                   |      |
|--------------------------------|--------------------------------------|-------------------|------|------------------------------------|-------------------|------|-------------------------------------------------------------|-------------------|------|
|                                | mean                                 | (95% CI interval) |      | mean                               | (95% CI interval) |      | mean                                                        | (95% CI interval) |      |
| prevalence                     | 0.35                                 | 0.25              | 0.47 | 0.32                               | 0.22              | 0.44 | 0.32                                                        | 0.22              | 0.44 |
| sensitivity                    | 0.81                                 | 0.60              | 0.93 | 0.83                               | 0.62              | 0.95 | 0.71                                                        | 0.49              | 0.87 |
| specificity                    | 0.50                                 | 0.35              | 0.65 | 0.48                               | 0.34              | 0.62 | 0.80                                                        | 0.66              | 0.89 |
| PPV                            | 0.47                                 | 0.32              | 0.62 | 0.43                               | 0.29              | 0.59 | 0.63                                                        | 0.42              | 0.80 |
| NPV                            | 0.83                                 | 0.64              | 0.93 | 0.86                               | 0.66              | 0.95 | 0.85                                                        | 0.71              | 0.93 |
| AUC                            | 0.63                                 |                   |      | 0.70                               |                   |      | 0.78                                                        |                   |      |

B

Moderate or severe UC clinical activity: PMS = 5-9

| test positive<br>test negative | LL-37 <60ng/ml<br>any others |                   |      | CRP 0.5mg/L or above<br>any others |                   |      | LL-37 <60ng/ml + CRP 0.5mg/L or above<br>any others |                   |      |
|--------------------------------|------------------------------|-------------------|------|------------------------------------|-------------------|------|-----------------------------------------------------|-------------------|------|
|                                | mean                         | (95% CI interval) |      | mean                               | (95% CI interval) |      | mean                                                | (95% CI interval) |      |
| prevalence                     | 0.22                         | 0.13              | 0.33 | 0.18                               | 0.10              | 0.29 | 0.22                                                | 0.13              | 0.33 |
| sensitivity                    | 0.94                         | 0.68              | 1.00 | 0.62                               | 0.32              | 0.85 | 0.69                                                | 0.41              | 0.88 |
| specificity                    | 0.31                         | 0.20              | 0.45 | 0.67                               | 0.54              | 0.78 | 0.78                                                | 0.64              | 0.87 |
| PPV                            | 0.27                         | 0.17              | 0.41 | 0.29                               | 0.14              | 0.49 | 0.46                                                | 0.26              | 0.67 |
| NPV                            | 0.95                         | 0.72              | 1.00 | 0.89                               | 0.76              | 0.96 | 0.90                                                | 0.78              | 0.96 |
| AUC                            | 0.75                         |                   |      | 0.70                               |                   |      | 0.72                                                |                   |      |
