# Supplementary material for: Circulating cathelicidin levels correlate with mucosal disease activity in ulcerative colitis, risk of intestinal stricture in Crohn’s disease, and clinical prognosis in inflammatory bowel disease
Source: Springer Nature journal article supplement (doi:10.1186/s12876-017-0619-4), 2017-05-12

Supplementary Figure 2

A

| Percentage of medication uses (%)      | biologics |        | steroids |        | immunomodulators |        | 5-ASA |        |
|----------------------------------------|-----------|--------|----------|--------|------------------|--------|-------|--------|
|                                        | 0mo       | 6-18mo | 0mo      | 6-18mo | 0mo              | 6-18mo | 0mo   | 6-18mo |
| initial PMS=0-1 LL-37 40ng/ml or above | 14        | 15     | 7        | 8      | 29               | 30     | 86    | 100    |
| initial PMS=0-1 any others             | 33        | 33     | 33       | 33     | 0                | 0      | 67    | 33     |
| initial PMS=5-9 LL-37 40ng/ml or above | 0         | 33     | 50       | 0      | 17               | 50     | 67    | 33     |
| initial PMS=5-9 any others             | 0         | 20     | 0        | 20     | 20               | 20     | 60    | 80     |

B

**Steroid free UC patients**

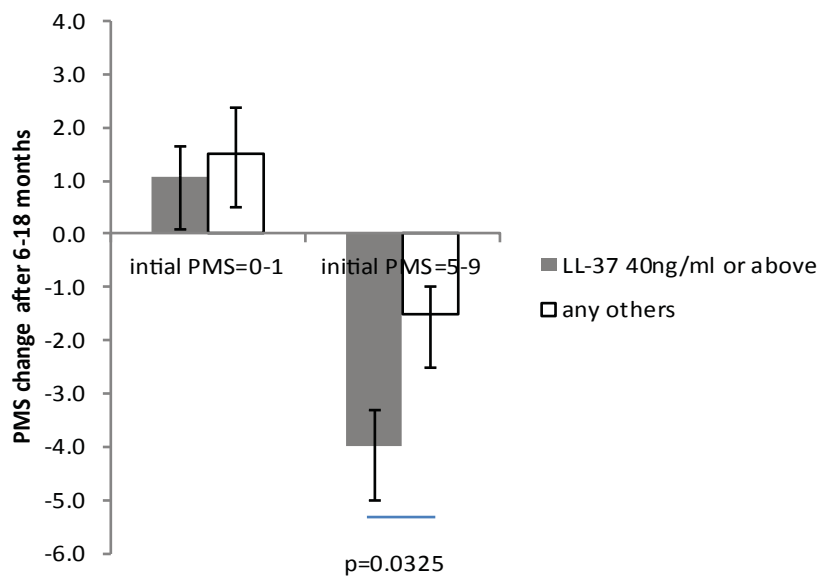

Supplement: MOESM2 [file 12281118]
