# Supplementary material for: Circulating cathelicidin levels correlate with mucosal disease activity in ulcerative colitis, risk of intestinal stricture in Crohn’s disease, and clinical prognosis in inflammatory bowel disease
Source: Springer Nature journal article supplement (doi:10.1186/s12876-017-0619-4), 2017-05-12
Supplement: MOESM3 [file 12281118]

Supplementary Figure 3

**A** UC endoscopic remission: Mayo endoscopic score = 0

|             | test positive | LL-37 above 32ng/ml |                   | CRP 0.4mg/L or below |                   | LL-37 above 32ng/ml + CRP 0.4mg/L or below |                   |
|-------------|---------------|---------------------|-------------------|----------------------|-------------------|--------------------------------------------|-------------------|
|             | test negative | any others          |                   | any others           |                   | any others                                 |                   |
|             |               | mean                | (95% CI interval) | mean                 | (95% CI interval) | mean                                       | (95% CI interval) |
| prevalence  |               | 0.27                | 0.14 0.46         | 0.23                 | 0.11 0.43         | 0.30                                       | 0.15 0.50         |
| sensitivity |               | 1.00                | 0.63 1.00         | 0.71                 | 0.30 0.95         | 1.00                                       | 0.63 1.00         |
| specificity |               | 0.38                | 0.20 0.59         | 0.30                 | 0.14 0.53         | 0.38                                       | 0.19 0.61         |
| PPV         |               | 0.38                | 0.20 0.59         | 0.24                 | 0.09 0.48         | 0.41                                       | 0.21 0.63         |
| NPV         |               | 1.00                | 0.63 1.00         | 0.78                 | 0.40 0.96         | 1.00                                       | 0.60 1.00         |
| AUC         |               | 0.76                |                   | 0.71                 |                   | 0.84                                       |                   |

**B** Severe UC endoscopic activity: Mayo endoscopic score = 3

|             | test positive | LL-37 below 60ng/ml |                   | CRP above 0.5 mg/L |                   | LL-37 below 60ng/ml + CRP above 0.5 mg/L |                   |
|-------------|---------------|---------------------|-------------------|--------------------|-------------------|------------------------------------------|-------------------|
|             | test negative | any others          |                   | any others         |                   | any others                               |                   |
|             |               | mean                | (95% CI interval) | mean               | (95% CI interval) | mean                                     | (95% CI interval) |
| prevalence  |               | 0.15                | 0.06 0.33         | 0.13               | 0.04 0.32         | 0.13                                     | 0.04 0.32         |
| sensitivity |               | 1.00                | 0.46 1.00         | 0.75               | 0.22 0.99         | 0.75                                     | 0.22 0.99         |
| specificity |               | 0.32                | 0.17 0.52         | 0.77               | 0.56 0.90         | 0.85                                     | 0.64 0.95         |
| PPV         |               | 0.21                | 0.08 0.43         | 0.33               | 0.09 0.69         | 0.43                                     | 0.12 0.80         |
| NPV         |               | 1.00                | 0.63 1.00         | 0.95               | 0.74 0.99         | 0.96                                     | 0.76 1.00         |
| AUC         |               | 0.59                |                   | 0.71               |                   | 0.80                                     |                   |

**C**

|                         |            | E1 | E2 | E3 | biologics | steroids | immunomodulators | 5-ASA |
|-------------------------|------------|----|----|----|-----------|----------|------------------|-------|
| LL-37 32 ng/ml or below | count      | 0  | 5  | 1  | 2         | 2        | 2                | 3     |
|                         | percentage | 0  | 83 | 17 | 33        | 33       | 33               | 50    |
| LL-37 above 32 ng/ml    | count      | 8  | 26 | 12 | 5         | 10       | 9                | 26    |
|                         | percentage | 19 | 60 | 28 | 12        | 23       | 21               | 60    |

|                        |                | E1 | E2 | E3 | biologics | steroids | immunomodulators | 5-ASA |
|------------------------|----------------|----|----|----|-----------|----------|------------------|-------|
| LL-37 below 60ng/ml    | count          | 7  | 24 | 7  | 7         | 16       | 7                | 23    |
|                        | percentage (%) | 18 | 60 | 18 | 16        | 37       | 16               | 54    |
| LL-37 60ng/ml or above | count          | 1  | 7  | 6  | 2         | 2        | 5                | 10    |
|                        | percentage (%) | 7  | 50 | 43 | 14        | 14       | 36               | 71    |

General disease phenotypes: Montreal classification of UC

- E1 Ulcerative proctitis
- E2 Left side UC (distal UC)
- E3 Extensive UC (pancolitis)
