# Supplementary material for: Circulating cathelicidin levels correlate with mucosal disease activity in ulcerative colitis, risk of intestinal stricture in Crohn’s disease, and clinical prognosis in inflammatory bowel disease
Source: Springer Nature journal article supplement (doi:10.1186/s12876-017-0619-4), 2017-05-12
Supplement: MOESM4 [file 12281118]

## Supplementary Figure 4

A

### CD clinical remission: HBI = 0-4

| test positive<br>test negative | LL-37 40ng/ml or above<br>any others |                   |      | CRP 0.4mg/L or below<br>any others |                   |      | LL-37 40ng/ml or above + CRP 0.4mg/L or below<br>any others |                   |      |
|--------------------------------|--------------------------------------|-------------------|------|------------------------------------|-------------------|------|-------------------------------------------------------------|-------------------|------|
|                                | mean                                 | (95% CI interval) |      | mean                               | (95% CI interval) |      | mean                                                        | (95% CI interval) |      |
| prevalence                     | 0.52                                 | 0.40              | 0.64 | 0.52                               | 0.40              | 0.64 | 0.52                                                        | 0.40              | 0.64 |
| sensitivity                    | 0.84                                 | 0.68              | 0.93 | 0.74                               | 0.57              | 0.86 | 0.63                                                        | 0.46              | 0.78 |
| specificity                    | 0.43                                 | 0.27              | 0.60 | 0.49                               | 0.32              | 0.66 | 0.69                                                        | 0.51              | 0.83 |
| PPV                            | 0.62                                 | 0.47              | 0.74 | 0.61                               | 0.45              | 0.75 | 0.69                                                        | 0.51              | 0.83 |
| NPV                            | 0.71                                 | 0.48              | 0.88 | 0.63                               | 0.42              | 0.80 | 0.63                                                        | 0.46              | 0.78 |
| AUC                            | 0.68                                 |                   |      | 0.63                               |                   |      | 0.67                                                        |                   |      |

B

### Moderate or severe CD clinical activity: HBI = 8 or above

| test positive<br>test negative | LL-37 below 40ng/ml<br>any others |                   |      | CRP 0.5mg/L or above<br>any others |                   |      | LL-37 below 40ng/ml + CRP 0.5mg/L or above<br>any others |                   |      |
|--------------------------------|-----------------------------------|-------------------|------|------------------------------------|-------------------|------|----------------------------------------------------------|-------------------|------|
|                                | mean                              | (95% CI interval) |      | mean                               | (95% CI interval) |      | mean                                                     | (95% CI interval) |      |
| prevalence                     | 0.25                              | 0.16              | 0.36 | 0.26                               | 0.17              | 0.38 | 0.25                                                     | 0.16              | 0.36 |
| sensitivity                    | 0.56                              | 0.31              | 0.78 | 0.42                               | 0.21              | 0.66 | 0.33                                                     | 0.14              | 0.59 |
| specificity                    | 0.80                              | 0.67              | 0.89 | 0.65                               | 0.51              | 0.77 | 0.95                                                     | 0.84              | 0.99 |
| PPV                            | 0.48                              | 0.26              | 0.70 | 0.30                               | 0.14              | 0.50 | 0.67                                                     | 0.31              | 0.91 |
| NPV                            | 0.85                              | 0.71              | 0.93 | 0.76                               | 0.61              | 0.87 | 0.81                                                     | 0.69              | 0.90 |
| AUC                            | 0.68                              |                   |      | 0.63                               |                   |      | 0.73                                                     |                   |      |

C

|                        |                | A1 |    |    | L1 |    |    |    | B1        |          |         | P | immunomod |    |    |    |
|------------------------|----------------|----|----|----|----|----|----|----|-----------|----------|---------|---|-----------|----|----|----|
|                        |                | A2 | A3 | L2 | L3 | L4 | B2 | B3 | biologics | steroids | ulators |   | 5-ASA     |    |    |    |
| LL-37 below 40ng/ml    | count          | 5  | 10 | 3  | 5  | 1  | 10 | 1  | 8         | 6        | 7       | 0 | 7         | 1  | 8  | 2  |
|                        | percentage (%) | 28 | 56 | 17 | 28 | 6  | 56 | 6  | 44        | 33       | 24      | 0 | 39        | 6  | 44 | 11 |
| LL-37 40ng/ml or above | count          | 13 | 31 | 5  | 9  | 11 | 29 | 3  | 30        | 10       | 11      | 0 | 24        | 19 | 18 | 14 |
|                        | percentage (%) | 27 | 64 | 10 | 18 | 22 | 59 | 6  | 61        | 20       | 22      | 0 | 49        | 39 | 37 | 29 |

#### General disease phenotypes: Montreal classification of CD

|    |                                        |
|----|----------------------------------------|
| A1 | CD Age at diagnosis less than 16 years |
| A2 | CD Age at diagnosis 17-40 years        |
| A3 | CD Age at diagnosis over 40 years      |
| L1 | CD ileal                               |
| L2 | CD colonic                             |
| L3 | CD ilealcolonic                        |
| L4 | CD isolated upper digestive tract      |
| B1 | CD non-stricturing, non-penetrating    |
| B2 | CD stricturing                         |
| B3 | CD penetrating                         |
| P  | CD perianal disease                    |
