# Supplementary material for: Circulating cathelicidin levels correlate with mucosal disease activity in ulcerative colitis, risk of intestinal stricture in Crohn’s disease, and clinical prognosis in inflammatory bowel disease
Source: Springer Nature journal article supplement (doi:10.1186/s12876-017-0619-4), 2017-05-12

Supplementary Figure 5

A

| Percentage of medication uses (%) |                        | biologics |        | steroids |        | immunomodulators |        | 5-ASA |        |
|-----------------------------------|------------------------|-----------|--------|----------|--------|------------------|--------|-------|--------|
|                                   |                        | 0mo       | 6-18mo | 0mo      | 6-18mo | 0mo              | 6-18mo | 0mo   | 6-18mo |
| initial HBI=0-4                   | LL-37 40ng/ml or above | 38        | 52     | 48       | 0      | 38               | 48     | 38    | 24     |
| initial HBI=0-4                   | any others             | 60        | 80     | 20       | 40     | 20               | 20     | 0     | 40     |
| initial HBI≥8                     | LL-37 40ng/ml or above | 78        | 63     | 44       | 0      | 22               | 25     | 11    | 13     |
| initial HBI≥8                     | any others             | 33        | 67     | 0        | 0      | 50               | 50     | 0     | 0      |

B

### Steroid free CD patients

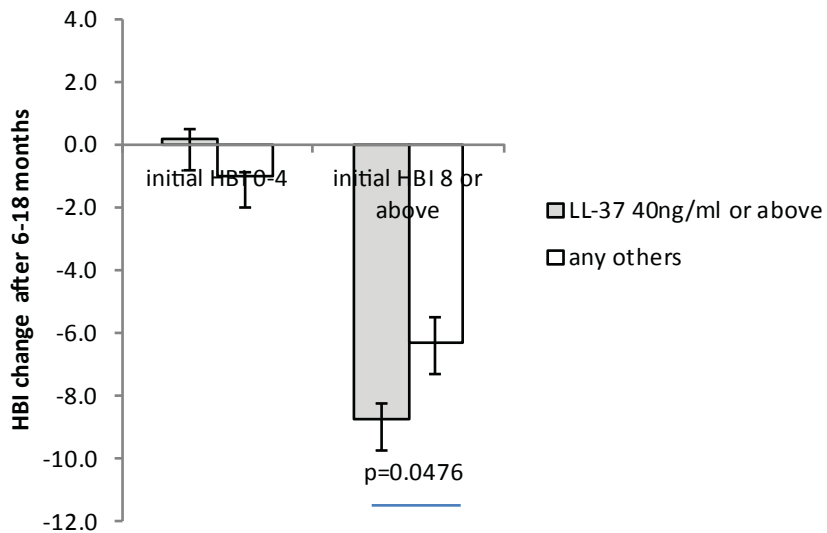

Supplement: MOESM5 [file 12281118]
